# Supplementary material for: Not just fat: investigating the proteome of cetacean blubber tissue
Source: PubMed Central journal article supplement (PMC5814904; doi:10.1093/conphys/coy003), 2018-02-16
Supplement: coy003revisedsupplementarymaterials.kershawetal.cetaceanblubberproteome.pdf [file coy003revisedsupplementarymaterials.kershawetal.cetaceanblubberproteome.pdf]

**SUPPLEMENTARY MATERIALS**

---

**Not just fat: Investigating the proteome of cetacean blubber tissue**

**\*Joanna L. Kershaw<sup>1</sup>, Catherine H. Botting<sup>2</sup>, Andrew Brownlow<sup>3</sup>, Ailsa J. Hall<sup>1</sup>**

\*Corresponding author: [jk49@st-andrews.ac.uk](mailto:jk49@st-andrews.ac.uk)

<sup>1</sup> Sea Mammal Research Unit, Scottish Oceans Institute, University of St Andrews, St Andrews,  
KY16 8LB, UK

<sup>2</sup> Biomedical Sciences Research Complex, School of Chemistry, Biomolecular Sciences Building  
Annexe, North Haugh, University of St Andrews, St Andrews, KY16 9ST, UK

<sup>3</sup> Scottish Marine Animals Strandings Scheme, SAC Consulting Veterinary Services, Inverness,  
IV2 5NA, UK

## **SUPPLEMENTARY METHODS**

### **1. Total Protein Extraction Methods**

#### **1.1 Methanol-Chloroform Precipitation with Methanol Pellet Wash**

16 full depth blubber subsamples were accurately weighed (0.4 - 0.6g) and homogenised with 0.5mL of isolation medium (50mM Tris, 150mM NaCl, 0.2mM EDTA and 10ug/ml protease inhibitors), and 1.875mL of 1:2 chloroform/methanol. Samples were then placed on ice for 15 minutes with thorough mixing every three minutes. 625ul of chloroform and 625ul of deionised water were added to the sample. The sample was vortexed and centrifuged at 800g for 5 minutes at 4<sup>0</sup>C. This creates three layers, a lower lipid layer, an upper protein layer and a protein disc between the two. The upper protein phase and the protein disc were collected and transferred to a new tube.

Three volumes of water, four volumes of methanol and one volume of chloroform were added to the solution and vortexed vigorously for 5 min so that only one phase was visible in the tube. The mixture was centrifuged at 4700g at 4<sup>0</sup>C for 30 min. This forms two immiscible layers with the protein precipitate at the interface between the two. The water /methanol top layer was removed, and care was taken not to disturb the interface as often precipitated proteins do not form a visibly white surface. Another four times the volume of methanol were added to wash the precipitate, and the mixture was again vortexed vigorously for 5 min. The mixture was centrifuged at 4700g at 4<sup>0</sup>C for 45 min. This forms a protein pellet in the bottom of the tube. The supernatant was removed and the pellet was dried under N<sub>2</sub> at room temperature. Care was taken not to over dry the pellet causing it to become flaky and stick to the centrifuge tube which reduces the resuspension efficiency. Finally, the pellet was resuspended in 500ul of SDS/Tris (0.1% SDS in 40mM Tris).

#### **1.2 TCA-Acetone Precipitation with Acetone Pellet Wash**

Using another 16, different, full-depth blubber subsamples, the same protocol as previously described was followed up to the collection of the upper protein phase and the protein disc, and its transfer to a new tube. 10% TCA in acetone solution was added to the sample with a ratio of 1:3 of sample to TCA-acetone solution. The sample was frozen overnight at -20<sup>0</sup>C. The sample was allowed to warm to room temperature and then centrifuged at 4700g at 4<sup>0</sup>C for 45 minutes the following day. Proteins form a pellet in the bottom of the tube. The pellet was washed twice by adding 1ml of ice cold acetone which was then discarded. Any remaining acetone following the final wash was evaporated under nitrogen at room temperature. Care was taken not to over-dry the protein pellet, and the pellet was resuspended in 500ul of SDS/Tris. Of the two protein precipitation methods, using a TCA-acetone solution showed least total protein inter-assay variability. For this reason, alterations were made to improve this protocol in an attempt to

firstly, further clean the extract, and secondly, to improve protein pellet resuspension by altering the pellet washing procedure.

#### Alteration 1: TCA-Acetone Precipitation with Butanol De-Lipidation and Acetone Pellet Wash

As cetacean blubber tissue has such a high lipid content, an extra butanol de-lipidation step was added before the precipitation of the protein pellet in an attempt to further ‘clean’ the extract (Zhao and Xu, 2010). Another 16 blubber subsamples were taken, as previously described, from the same individuals used for the TCA-acetone precipitation protocol. Following the collection of the upper protein phase and protein disc (after homogenisation and centrifugation), butanol was added in a ratio of 1:3 sample to butanol. This was then centrifuged at 1750g at 10<sup>0</sup>C for 10 min and the upper phase containing any remaining lipids was removed and discarded. 10% TCA in acetone was added to the lower phase, and the precipitation and pellet wash continued as described above. The final protein pellet was resuspended in 500ul of SDS/Tris.

#### Alteration 2: TCA-Acetone Precipitation with Water Wash

Poor resuspension of the protein pellet in the SDS-Tris Buffer could result in under-estimates of total protein content if some pellets resuspend less efficiently than others. The effect of a different pellet wash was tested by using de-ionised water instead of acetone for the final wash stage. This was an attempt not to dehydrate the pellet, and therefore make its resuspension back into solution more efficient. As before, 16 blubber subsamples were taken from the same eight individuals used for the TCA-acetone precipitation protocol. Specifically, following the precipitation of the proteins in TCA-acetone, care was taken to discard all TCA-acetone solution, and the pellet was washed by adding 1ml of deionised water. It was vortexed briefly, and then centrifuged again for 5 min at 4700g at 4<sup>0</sup>C. The supernatant was again discarded, and the pellet washed a second time with deionized water. Care was taken not to disturb the washed pellet that was then re-suspended in 500ul of SDS/Tris.

### **1.3 RIPA Lysis and Extraction Buffer**

Another 16, full depth blubber samples were used for analysis from 8 individuals. The subsamples were accurately weighed ( $0.1 \pm 0.01$ g). The frozen tissue was placed on ice in a 1.5ml low protein binding micro-centrifuge tube and 200ul RIPA lysis and extraction buffer (Thermo Fisher Scientific) with 2X concentration of protease inhibitors (Pierce Protease Inhibitor Mini Tablets) was added to the tissue. The samples were homogenised with a pestle designed for a 1.5ml tube for two minutes to give a cloudy white solution and small piece of connective tissue that could not be further homogenised. The samples were replaced on ice and then centrifuged at 4700g at 4<sup>0</sup>C for 15 minutes before being replaced on ice. The supernatant, the hardened lipid containing fraction, was pushed to one side, and the protein containing infranatant was removed and placed into a clean, low protein binding microcentrifuge tube. Care

was taken not to disturb the insoluble/unhomogenised connective tissue pellet. The protein fraction was centrifuged, as before, as a second de-lipidation step, and replaced on ice. Again, the infranatant was removed and placed in a clean, low protein binding microcentrifuge tube taking care not to disturb any remaining lipid supernatant and insoluble pellet.

## **2. Total Protein Quantification Assays**

To assess the effectiveness of the different protein extraction methods, two different commercially available total protein quantification kits were used to measure the protein in the blubber extracts. Firstly, a Pierce™ BCA Protein Assay Kit (23225, Thermo Scientific, Rockford, USA) was used to quantify the total protein in the extracts resuspended in SDS-Tris using the chloroform-methanol and TCA-acetone precipitation methods. The assay is a detergent-compatible formulation based on bicinchoninic acid (BCA) for the colorimetric detection and quantitation of total protein. This assay has a broad working range of protein concentrations between 20-2000µg/mL. A series of dilutions of known concentrations of bovine serum albumin were prepared using the same SDS/Tris used to re-suspend the protein extracts, and assayed alongside blubber extracts to determine their protein concentrations based on the standard curve produced using a log-logistic 4 parameter model. As blubber extract sample volumes are small, the microplate procedure was chosen for this analysis and assays were carried out following the kit instructions. Each extract was assayed in duplicate on every plate, a negative control of SDS/Tris was run on every plate, and total protein concentrations were reported as µg per wet weight of the sample. Each extract was assayed on three different plates in order to determine the inter-assay coefficient of variation (% CV), and the average concentration measured across the three plates was used as the final estimated total protein content of a sample.

Secondly, a Pierce™ 660nm Protein Assay (22662, Thermo Scientific, Rockford, USA) was used to quantify the total protein in the extracts processed in RIPA lysis and extraction buffer. This is a quick, ready-to-use colorimetric method for total protein quantitation, and is compatible with high concentrations of most detergents and reducing agents, and is therefore compatible with the RIPA buffer supplemented with 2X protease inhibitors used here. The blubber extracts were prepared following the assay instructions for cell lysates in RIPA buffer by adding Triton™ X-100 to a final concentration of 0.8% to the sample before performing the assay. A series of dilutions of known concentrations of bovine serum albumin were used to generate a standard curve. A negative control of RIPA with 2X protease inhibitors was used as the zero standard on each plate, and the absorbance measured was used to correct the absorbance of the standard curve measurements which were then used to produce a 4 parameter log-logistic model and calculate the protein concentrations in the samples. The assay was performed following the microplate protocol and the absorbance read at 660nm. Each extract was assayed in duplicate and total protein concentrations are reported as µg per wet weight of the sample. Each extract was assayed on two different plates in order to determine the inter-assay CV (% CV), and the

average concentration measured across the two plates was used as the final estimated total protein content of a sample.

### **3. 1D SDS-PAGE Protein Separation**

The final stage of the method development was to optimise protein separation and visualisation using 1D SDS-PAGE (Sodium Dodecyl Sulfate - Polyacrylamide Gel Electrophoresis) which separates denatured proteins based on their molecular weight. The XCell SureLock® Mini-Cell (Life Technologies, UK) gel electrophoresis unit was used to run 4-12% NuPAGE Bis-Tris mini gels (8.0cm x 8.0cm x 1.0mm) (NP0321BOX, Thermo Fisher Scientific, Paisley, UK) with a wide protein separation range of 3.5 kDa to 160 kDa. The recommended sample and running buffers for de-natured proteins as listed by the manufacturers were used to run the gels: 1x NuPAGE LDS Sample Buffer (NP0007, Thermo Fisher Scientific, Paisley, UK) and 1x NuPAGE MES SDS Running Buffer (NP000202, Thermo Fisher Scientific, Paisley, UK). Standard running conditions as recommended by the manufacturers were also chosen: a constant voltage of 200V and a current of 125mA for 35 minutes. A wide protein range ladder, Invitrogen™ Novex™ Mark 12™ Unstained Standard (LC5677, Fisher Scientific, USA) was run on each gel. The blubber extracts resuspended in SDS-Tris were run undiluted on the gels while the extracts in RIPA buffer were run at ½ and ⅓ dilutions as the protein content of these extracts was much higher. 5µl of NuPAGE LDS Sample Buffer (4x) was added to 20µl of each of the blubber extracts (neat or diluted). 10µl of each of these were loaded onto the gel. Upon completion of the run, the gels were removed from the cassettes and rinsed in de-ionised water briefly to remove residual SDS that affects the staining procedure. The gels were stained in 500ml of Bio-Safe Coomassie Stain (1610786, Bio-Rad, UK) for 1.5 hours with gentle agitation on a platform shaker. This stain is fast, simple, sensitive and convenient in it's ready to use and non-hazardous solution. The gels were then removed from the stain, rinsed and detained in de-ionised water overnight. The de-stained gels were photographed on a white background using a BioDoc-It™ Imaging System (Ultra-Violet Products Ltd, Cambridge, UK).

## SUPPLEMENTARY RESULTS

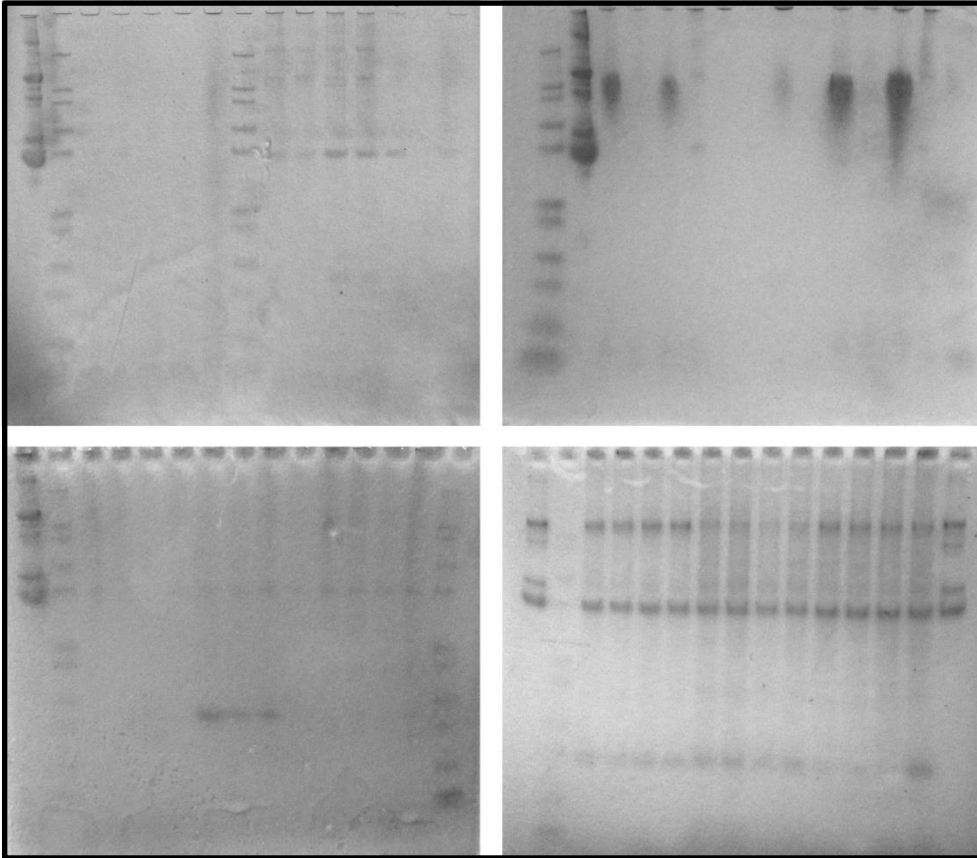

**Fig. 1.** Example images of 1D SDS-PAGE analysis of harbour porpoise blubber tissue extracts processed using Methods 1 and 2 on 4-12% Bis-Tris gels stained with Bio-Safe Coomassie brilliant blue. Extracts show few protein bands only across the larger size range. There is high background and some protein smearing. In addition, there is poor reproducibility of bands across extracts and across gels.

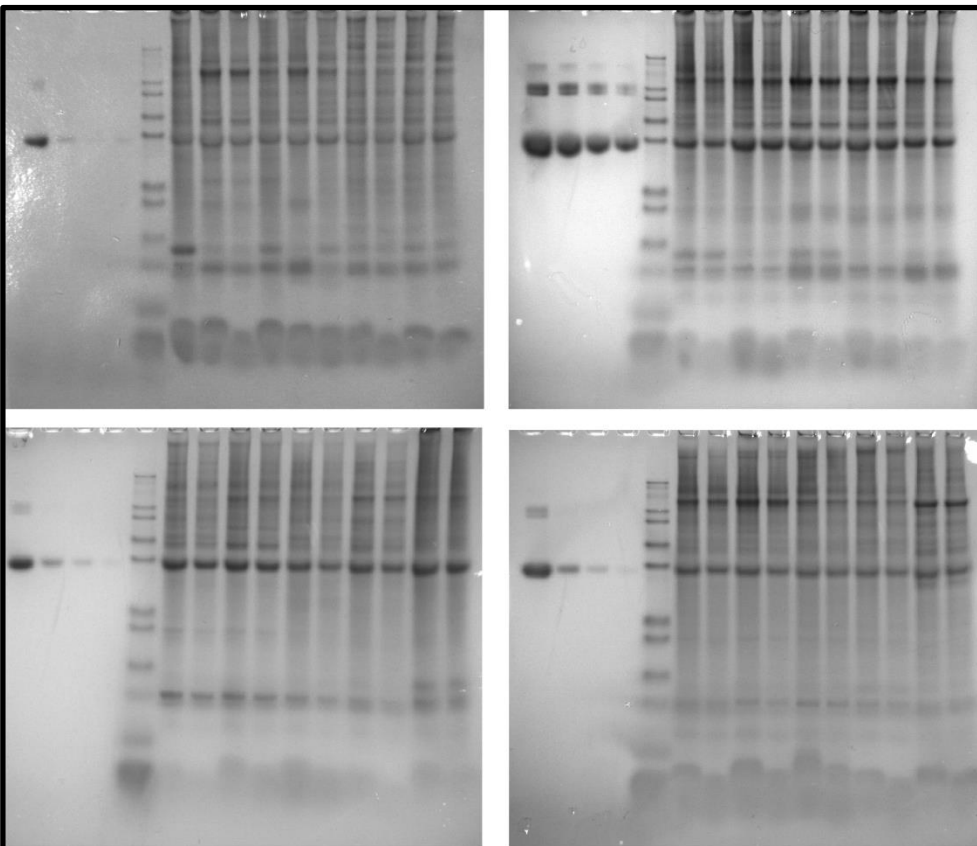

**Fig. 2.** Example images of 1D SDS-PAGE analysis of harbour porpoise blubber tissue extracts processed using Methods 3 on 4-12% Bis-Tris gels stained with Bio-Safe Coomassie brilliant blue. Extracts show a large number of protein bands over a wide range of protein sizes. Protein taining is high with minimal background and smearing. Reproducibility of bands across extracts and across gels is excellent.

**Table 1.** 295 proteins, with 2 or more peptides with Mascot Ion Scores above the Identity ( $p < 0.05$ ) Threshold, identified in the harbour porpoise blubber extracts grouped by functional group. The total frequency is the number of times the protein was identified across all 36 samples analysed by nLC-ESI-MS/MS.

| <b>Protein Name</b>                         | <b>Protein Type</b> | <b>Protein Group</b>         | <b>Specific Function</b> | <b>Total Frequency</b> |
|---------------------------------------------|---------------------|------------------------------|--------------------------|------------------------|
| 4-trimethylaminobutyraldehyde dehydrogenase | Enzyme              | Amino Acid Metabolism        |                          | 1                      |
| dipeptidase                                 | Enzyme              | Amino Acid Metabolism        |                          | 1                      |
| leucine aminopeptidase                      | Enzyme              | Amino Acid Metabolism        |                          | 1                      |
| trypsin inhibitor                           | Enzyme              | Amino Acid Metabolism        |                          | 1                      |
| xaa-Pro aminopeptidase 1                    | Enzyme              | Amino Acid Metabolism        |                          | 1                      |
| Xaa-Pro dipeptidase                         | Enzyme              | Amino Acid Metabolism        |                          | 1                      |
| translation factor GUF1 homolog             | Regulatory          | Amino Acid Metabolism        |                          | 1                      |
| 3-hydroxy-2-methylbutyryl-CoA dehydrogenase | Enzyme              | Amino Acid Metabolism        |                          | 1                      |
| insulin-activated amino acid transporter    | Transport           | Amino Acid Metabolism        |                          | 2                      |
| aminotransferase                            | Enzyme              | Amino Acid Metabolism        |                          | 3                      |
| cyclase-associated protein                  | Regulatory          | Cell Function and Metabolism | Actin-Binding            | 1                      |
| macrophage-capping protein                  | Regulatory          | Cell Function and Metabolism | Actin-Binding            | 1                      |
| AHNAK nucleoprotein                         | Regulatory          | Cell Function and Metabolism | Adapter                  | 1                      |
| cellular retinoic acid-binding protein 3    | Regulatory          | Cell Function and Metabolism | Adapter                  | 1                      |
| cytochrome b5                               | Transport           | Cell Function and Metabolism | Adapter                  | 1                      |
| MICOS complex subunit MIC61                 | Regulatory          | Cell Function and Metabolism | Adapter                  | 1                      |
| mitochondrial fission 1 protein             | Regulatory          | Cell Function and Metabolism | Adapter                  | 1                      |

**Supplementary Materials** - Kershaw *et al.* Not just fat: Investigating the proteome of cetacean blubber tissue

|                                                    |            |                              |              |    |
|----------------------------------------------------|------------|------------------------------|--------------|----|
| plasma membrane calcium ATPase                     | Regulatory | Cell Function and Metabolism | Adapter      | 1  |
| prostaglandin F2 receptor negative regulator       | Regulatory | Cell Function and Metabolism | Adapter      | 1  |
| puromycin-sensitive aminopeptidase                 | Enzyme     | Cell Function and Metabolism | Adapter      | 1  |
| RNA-binding motif protein 3                        | Regulatory | Cell Function and Metabolism | Adapter      | 1  |
| serpin peptidase inhibitor                         | Regulatory | Cell Function and Metabolism | Adapter      | 1  |
| SH3 domain-binding glutamic acid-rich-like protein | Regulatory | Cell Function and Metabolism | Adapter      | 1  |
| solute carrier family proteins                     | Regulatory | Cell Function and Metabolism | Adapter      | 1  |
| SSR                                                | Regulatory | Cell Function and Metabolism | Adapter      | 1  |
| succinate dehydrogenase flavoprotein               | Enzyme     | Cell Function and Metabolism | Adapter      | 1  |
| synaptic vesicle membrane protein VAT-1            | Regulatory | Cell Function and Metabolism | Adapter      | 1  |
| TPA: heparan sulfate proteoglycan 2                | Regulatory | Cell Function and Metabolism | Adapter      | 1  |
| peptidyl-prolyl cis-trans isomerase B              | Enzyme     | Cell Function and Metabolism | Adapter      | 2  |
| transitional endoplasmic reticulum ATPase          | Enzyme     | Cell Function and Metabolism | Adapter      | 2  |
| 14-3-3 protein                                     | Regulatory | Cell Function and Metabolism | Adapter      | 3  |
| gelsolin                                           | Regulatory | Cell Function and Metabolism | Adapter      | 4  |
| phosphate carrier protein                          | Transport  | Cell Function and Metabolism | Adapter      | 4  |
| platelet glycoprotein 4-like                       | Regulatory | Cell Function and Metabolism | Adapter      | 7  |
| periostin                                          | Regulatory | Cell Function and Metabolism | Adapter      | 9  |
| biglycan                                           | Regulatory | Cell Function and Metabolism | Adapter      | 10 |
| adenine phosphoribosyltransferase                  | Enzyme     | Cell Function and Metabolism | Biosynthesis | 1  |
| glycyl-tRNA synthetase                             | Enzyme     | Cell Function and Metabolism | Biosynthesis | 1  |



**Supplementary Materials** - Kershaw *et al.* Not just fat: Investigating the proteome of cetacean blubber tissue

|                                                       |            |                              |               |   |
|-------------------------------------------------------|------------|------------------------------|---------------|---|
| iron response element binding protein                 | Regulatory | Cell Function and Metabolism | Biosynthesis  | 1 |
| nucleoside diphosphate kinase A                       | Enzyme     | Cell Function and Metabolism | Biosynthesis  | 1 |
| asparagine synthetase                                 | Enzyme     | Cell Function and Metabolism | Biosynthesis  | 2 |
| enhancer protein                                      | Regulatory | Cell Function and Metabolism | Biosynthesis  | 2 |
| glutamate dehydrogenase (NAD(P)+)                     | Enzyme     | Cell Function and Metabolism | Biosynthesis  | 2 |
| protein glycosyltransferase                           | Enzyme     | Cell Function and Metabolism | Biosynthesis  | 2 |
| elongation factors                                    | Regulatory | Cell Function and Metabolism | Biosynthesis  | 4 |
| S100A4                                                | Regulatory | Cell Function and Metabolism | Cell Adhesion | 1 |
| transforming growth factor-beta-induced protein ig-h3 | Regulatory | Cell Function and Metabolism | Cell Adhesion | 3 |
| cell surface glycoprotein MUC18                       | Regulatory | Cell Function and Metabolism | Cell Adhesion | 5 |
| homeodomain-interacting protein kinase 2-like         | Enzyme     | Cell Function and Metabolism | Cell Cycle    | 1 |
| olfactomedin-like 1                                   | Regulatory | Cell Function and Metabolism | Cell Cycle    | 1 |
| PEA-15                                                | Regulatory | Cell Function and Metabolism | Cell Cycle    | 1 |
| T-cell leukemia homeobox protein 3                    | Regulatory | Cell Function and Metabolism | Cell Cycle    | 1 |
| carnitine O-acetyltransferase                         | Enzyme     | Cell Function and Metabolism | Cell Cycle    | 4 |
| ADP/ATP translocase 3                                 | Regulatory | Cell Function and Metabolism | Channel       | 1 |
| insulin-like growth factor II receptor                | Regulatory | Cell Function and Metabolism | Channel       | 1 |
| large neutral amino acids transporter                 | Transport  | Cell Function and Metabolism | Channel       | 1 |
| LETM1 and EF-hand domain-containing protein 2         | Regulatory | Cell Function and Metabolism | Channel       | 1 |
| mannose-6-phosphate receptor                          | Regulatory | Cell Function and Metabolism | Channel       | 1 |
| vacuolar H <sup>+</sup> -ATPase                       | Enzyme     | Cell Function and Metabolism | Channel       | 1 |

**Supplementary Materials** - Kershaw *et al.* Not just fat: Investigating the proteome of cetacean blubber tissue

|                                  |            |                              |                    |   |
|----------------------------------|------------|------------------------------|--------------------|---|
| ATP synthase                     | Enzyme     | Cell Function and Metabolism | Channel            | 5 |
| 4F2 antigen                      | Regulatory | Cell Function and Metabolism | Channel            | 5 |
| endoplasmin                      | Regulatory | Cell Function and Metabolism | Chaperone          | 1 |
| hsc70-interacting protein        | Regulatory | Cell Function and Metabolism | Chaperone          | 1 |
| importin                         | Transport  | Cell Function and Metabolism | Chaperone          | 1 |
| lanC-like protein 1              | Regulatory | Cell Function and Metabolism | Chaperone          | 1 |
| protein deglycase DJ-1           | Regulatory | Cell Function and Metabolism | Chaperone          | 1 |
| T-complex protein 1              | Regulatory | Cell Function and Metabolism | Chaperone          | 1 |
| calreticulin                     | Regulatory | Cell Function and Metabolism | Chaperone          | 2 |
| calnexin                         | Regulatory | Cell Function and Metabolism | Chaperone          | 3 |
| protein disulfide-isomerases     | Enzyme     | Cell Function and Metabolism | Chaperone          | 5 |
| DNA polymerase                   | Enzyme     | Cell Function and Metabolism | DNA Metabolism     | 1 |
| histones                         | Regulatory | Cell Function and Metabolism | DNA Metabolism     | 3 |
| ADP-ribosylation factor 2-like   | Regulatory | Cell Function and Metabolism | GTPase             | 1 |
| rab GDP dissociation inhibitor   | Regulatory | Cell Function and Metabolism | GTPase             | 1 |
| Rab5c-like protein               | Regulatory | Cell Function and Metabolism | GTPase             | 1 |
| rho GDP-dissociation inhibitor 2 | Regulatory | Cell Function and Metabolism | GTPase             | 1 |
| heat shock protein 84            | Regulatory | Cell Function and Metabolism | Heat Shock Protein | 1 |
| heat shock protein 60            | Regulatory | Cell Function and Metabolism | Heat Shock Protein | 2 |
| heat shock protein 90            | Regulatory | Cell Function and Metabolism | Heat Shock Protein | 2 |
| heat shock protein 70            | Regulatory | Cell Function and Metabolism | Heat Shock Protein | 4 |

**Supplementary Materials** - Kershaw *et al.* Not just fat: Investigating the proteome of cetacean blubber tissue

|                                               |            |                              |            |   |
|-----------------------------------------------|------------|------------------------------|------------|---|
| S-adenosylhomocysteine hydrolase              | Enzyme     | Cell Function and Metabolism | Hydrolase  | 1 |
| proteasome subunits                           | Regulatory | Cell Function and Metabolism | Hydrolase  | 8 |
| 2-oxoglutarate dehydrogenase                  | Enzyme     | Cell Function and Metabolism | Metabolism | 1 |
| 6-phosphofructokinase                         | Enzyme     | Cell Function and Metabolism | Metabolism | 1 |
| Adenylate monophosphate kinase                | Enzyme     | Cell Function and Metabolism | Metabolism | 1 |
| aspartyl beta-hydroxylase                     | Enzyme     | Cell Function and Metabolism | Metabolism | 1 |
| Atp5b protein                                 | Enzyme     | Cell Function and Metabolism | Metabolism | 1 |
| delta-1-pyrroline-5-carboxylate dehydrogenase | Enzyme     | Cell Function and Metabolism | Metabolism | 1 |
| flavin reductase (NADPH)                      | Enzyme     | Cell Function and Metabolism | Metabolism | 1 |
| Methylmalonyl-CoA decarboxylase               | Enzyme     | Cell Function and Metabolism | Metabolism | 1 |
| NADP-dependent malic enzyme                   | Enzyme     | Cell Function and Metabolism | Metabolism | 1 |
| phosphoglycerate mutase 2                     | Enzyme     | Cell Function and Metabolism | Metabolism | 1 |
| prohibitin                                    | Regulatory | Cell Function and Metabolism | Metabolism | 1 |
| retinal dehydrogenase 1                       | Enzyme     | Cell Function and Metabolism | Metabolism | 1 |
| Rieske Fe-S protein                           | Regulatory | Cell Function and Metabolism | Metabolism | 1 |
| glucose-6-phosphate dehydrogenase             | Enzyme     | Cell Function and Metabolism | Metabolism | 2 |
| PKM2 protein                                  | Enzyme     | Cell Function and Metabolism | Metabolism | 2 |
| 6-phosphogluconate dehydrogenase              | Enzyme     | Cell Function and Metabolism | Metabolism | 2 |
| aconitate hydratase                           | Enzyme     | Cell Function and Metabolism | Metabolism | 2 |
| glutathione S-transferase P-like              | Enzyme     | Cell Function and Metabolism | Metabolism | 2 |
| pyruvate dehydrogenase                        | Enzyme     | Cell Function and Metabolism | Metabolism | 2 |

**Supplementary Materials** - Kershaw *et al.* Not just fat: Investigating the proteome of cetacean blubber tissue

|                                                                |            |                              |                                    |    |
|----------------------------------------------------------------|------------|------------------------------|------------------------------------|----|
| sodium/potassium-transporting ATPase                           | Enzyme     | Cell Function and Metabolism | Metabolism                         | 2  |
| transaldolase                                                  | Enzyme     | Cell Function and Metabolism | Metabolism                         | 2  |
| creatine kinases                                               | Enzyme     | Cell Function and Metabolism | Metabolism                         | 3  |
| cytochrome b5 reductase                                        | Enzyme     | Cell Function and Metabolism | Metabolism                         | 3  |
| transketolase                                                  | Enzyme     | Cell Function and Metabolism | Metabolism                         | 5  |
| aldolases                                                      | Enzyme     | Cell Function and Metabolism | Metabolism                         | 5  |
| triosephosphate isomerase                                      | Enzyme     | Cell Function and Metabolism | Metabolism                         | 7  |
| pyruvate kinase                                                | Enzyme     | Cell Function and Metabolism | Metabolism                         | 7  |
| GAPDH                                                          | Enzyme     | Cell Function and Metabolism | Metabolism                         | 9  |
| amine oxidase                                                  | Enzyme     | Cell Function and Metabolism | Metabolism                         | 10 |
| carbonic anhydrases                                            | Enzyme     | Cell Function and Metabolism | Metabolism                         | 10 |
| lactate dehydrogenase                                          | Enzyme     | Cell Function and Metabolism | Metabolism                         | 13 |
| ethylmalonyl-CoA decarboxylase                                 | Enzyme     | Cell Function and Metabolism | Protective                         | 1  |
| selenium-binding protein 1                                     | Regulatory | Cell Function and Metabolism | Protective                         | 1  |
| transmembrane protein 109                                      | Regulatory | Cell Function and Metabolism | Protective                         | 2  |
| aspartyl aminopeptidase                                        | Enzyme     | Cell Function and Metabolism | Protein Dedgadation / Modification | 1  |
| GANAB protein                                                  | Enzyme     | Cell Function and Metabolism | Protein Dedgadation / Modification | 1  |
| ubiquitin-like modifier-activating enzyme 1                    | Enzyme     | Cell Function and Metabolism | Protein Dedgadation / Modification | 1  |
| cAMP-dependent protein kinase                                  | Enzyme     | Cell Function and Metabolism | Protein Dedgadation / Modification | 2  |
| CAND1 protein                                                  | Regulatory | Cell Function and Metabolism | Protein Degradation /Modification  | 1  |
| dolichyl-diphosphooligosaccharide--protein glycosyltransferase | Enzyme     | Cell Function and Metabolism | Protein Degradation / Modification | 1  |

**Supplementary Materials** - Kershaw *et al.* Not just fat: Investigating the proteome of cetacean blubber tissue

|                                            |            |                              |                                    |   |
|--------------------------------------------|------------|------------------------------|------------------------------------|---|
| cathepsin D                                | Enzyme     | Cell Function and Metabolism | Protein Degradation / Modification | 2 |
| phosphatidylethanolamine-binding protein 1 | Regulatory | Cell Function and Metabolism | Protein Degradation / Modification | 2 |
| prolyl endopeptidase                       | Enzyme     | Cell Function and Metabolism | Protein Degradation / Modification | 1 |
| protein kinase                             | Enzyme     | Cell Function and Metabolism | Protein Degradation / Modification | 1 |
| Protein kinase C inhibitor                 | Regulatory | Cell Function and Metabolism | Protein Degradation / Modification | 1 |
| pseudouridine-5'-phosphatase               | Enzyme     | Cell Function and Metabolism | Protein Degradation / Modification | 1 |
| signal peptidase complex                   | Enzyme     | Cell Function and Metabolism | Protein Degradation / Modification | 1 |
| prenylcysteine oxidase 1                   | Enzyme     | Cell Function and Metabolism | Protein Degradation / Modification | 2 |
| ubiquitin                                  | Regulatory | Cell Function and Metabolism | Protein Degradation / Modification | 1 |
| fetuin-B                                   | Enzyme     | Cell Function and Metabolism | Protein Degradation / Modification | 5 |
| dihydrolipoamide dehydrogenase             | Enzyme     | Cell Function and Metabolism | Redox Protein                      | 1 |
| manganese superoxide dismutase             | Enzyme     | Cell Function and Metabolism | Redox Protein                      | 1 |
| redox-regulatory protein FAM213A           | Regulatory | Cell Function and Metabolism | Redox Protein                      | 1 |
| thioredoxin                                | Regulatory | Cell Function and Metabolism | Redox Protein                      | 1 |
| thioredoxin peroxidase                     | Enzyme     | Cell Function and Metabolism | Redox Protein                      | 1 |
| thioredoxin reductase                      | Enzyme     | Cell Function and Metabolism | Redox Protein                      | 1 |
| Cu/Zn superoxide dismutase                 | Enzyme     | Cell Function and Metabolism | Redox Protein                      | 2 |
| glutathione peroxidase                     | Enzyme     | Cell Function and Metabolism | Redox Protein                      | 2 |
| thioredoxin-dependent peroxide reductase   | Enzyme     | Cell Function and Metabolism | Redox Protein                      | 2 |
| microsomal glutathione S-transferase 1     | Enzyme     | Cell Function and Metabolism | Redox Protein                      | 3 |
| catalase                                   | Enzyme     | Cell Function and Metabolism | Redox Protein                      | 4 |

**Supplementary Materials** - Kershaw *et al.* Not just fat: Investigating the proteome of cetacean blubber tissue

|                                             |            |                              |                     |   |
|---------------------------------------------|------------|------------------------------|---------------------|---|
| peroxiredoxin                               | Enzyme     | Cell Function and Metabolism | Redox Protein       | 4 |
| polyadenylate-binding protein 1             | Regulatory | Cell Function and Metabolism | RNA Metabolism      | 1 |
| ribonucleoprotein                           | Regulatory | Cell Function and Metabolism | RNA Metabolism      | 1 |
| RNA polymerase                              | Enzyme     | Cell Function and Metabolism | RNA Metabolism      | 1 |
| ribonuclease inhibitor                      | Regulatory | Cell Function and Metabolism | RNA Metabolism      | 2 |
| nucleolin                                   | Structural | Cell Function and Metabolism | RNA Metabolism      | 3 |
| ribosomal proteins                          | Regulatory | Cell Function and Metabolism | RNA Metabolism      | 7 |
| eukaryotic translation initiation factor 4  | Regulatory | Cell Function and Metabolism | RNA Regulation      | 1 |
| Gry-rbp                                     | Regulatory | Cell Function and Metabolism | RNA Regulation      | 1 |
| NF45 protein                                | Regulatory | Cell Function and Metabolism | RNA Regulation      | 1 |
| DEAD box protein RB                         | Regulatory | Cell Function and Metabolism | RNA Regulation      | 2 |
| heterogeneous nuclear ribonucleoprotein R   | Regulatory | Cell Function and Metabolism | RNA Regulation      | 3 |
| lupus La protein                            | Regulatory | Cell Function and Metabolism | RNA Regulation      | 3 |
| dapper homolog 2                            | Regulatory | Cell Function and Metabolism | Signal Transduction | 1 |
| mitochondrial import receptor subunit TOM70 | Regulatory | Cell Function and Metabolism | Signal Transduction | 1 |
| phospholipase c delta 1                     | Enzyme     | Cell Function and Metabolism | Signal Transduction | 1 |
| phosphoprotein phosphatase                  | Enzyme     | Cell Function and Metabolism | Signal Transduction | 1 |
| CD81 antigen                                | Regulatory | Cell Function and Metabolism | Signal Transduction | 2 |
| Transforming protein RhoA                   | Regulatory | Cell Function and Metabolism | Signal Transduction | 2 |
| polymerase I and transcript release factor  | Regulatory | Cell Function and Metabolism | Signal Transduction | 5 |
| Ras proteins                                | Regulatory | Cell Function and Metabolism | Signal Transduction | 6 |

**Supplementary Materials** - Kershaw *et al.* Not just fat: Investigating the proteome of cetacean blubber tissue

|                                                  |            |                              |               |   |
|--------------------------------------------------|------------|------------------------------|---------------|---|
| ADP-ribosylation factor-like protein 8B          | Regulatory | Cell Function and Metabolism | Trafficking   | 1 |
| Alpha-soluble NSF attachment protein<br>clathrin | Regulatory | Cell Function and Metabolism | Trafficking   | 1 |
| GTP-binding protein                              | Regulatory | Cell Function and Metabolism | Trafficking   | 1 |
| huntingtin interacting protein                   | Regulatory | Cell Function and Metabolism | Trafficking   | 1 |
| NIPSNAP2 protein                                 | Regulatory | Cell Function and Metabolism | Trafficking   | 1 |
| vesicle-trafficking protein SEC22b               | Regulatory | Cell Function and Metabolism | Trafficking   | 1 |
| caveolin                                         | Regulatory | Cell Function and Metabolism | Trafficking   | 3 |
| NADH dehydrogenase                               | Enzyme     | Cell Function and Metabolism | Trafficking   | 4 |
| profilin-1                                       | Structural | Cell Structure               | Actin Binding | 1 |
| protein 4.1                                      | Structural | Cell Structure               | Actin Binding | 1 |
| alpha-actinin-1                                  | Structural | Cell Structure               | Actin Binding | 2 |
| transgelin                                       | Structural | Cell Structure               | Actin Binding | 2 |
| F-actin-capping protein                          | Structural | Cell Structure               | Actin-Binding | 1 |
| fascin                                           | Structural | Cell Structure               | Actin-Binding | 1 |
| cadherin-13                                      | Structural | Cell Structure               | Cell Adhesion | 1 |
| ezrin isoform X1                                 | Structural | Cell Structure               | Cell Adhesion | 1 |
| laminin-binding protein                          | Structural | Cell Structure               | Cell Adhesion | 1 |
| microfibril-associated glycoprotein 4            | Structural | Cell Structure               | Cell Adhesion | 1 |
| mitogen inducible gene mig-2                     | Structural | Cell Structure               | Cell Adhesion | 2 |
| integrins                                        | Structural | Cell Structure               | Cell Adhesion | 4 |

**Supplementary Materials** - Kershaw *et al.* Not just fat: Investigating the proteome of cetacean blubber tissue

|                                      |            |                     |                      |    |
|--------------------------------------|------------|---------------------|----------------------|----|
| fermitin homologue 2                 | Structural | Cell Structure      | Cell Motility        | 1  |
| WDR1 protein                         | Regulatory | Cell Structure      | Cell Motility        | 1  |
| moesin                               | Structural | Cell Structure      | Cell Motility        | 2  |
| p64 CLCP                             | Structural | Cell Structure      | Cell Motility        | 2  |
| vinculin                             | Structural | Cell Structure      | Cell Motility        | 2  |
| talin                                | Structural | Cell Structure      | Cell Motility        | 4  |
| stomatin peptide                     | Structural | Cell Structure      | Membrane Protein     | 1  |
| spectrin                             | Structural | Cell Structure      | Membrane Protein     | 4  |
| laminin                              | Structural | Cell Structure      | Membrane Protein     | 11 |
| T-plastin                            | Regulatory | Cell Structure      | Structural Integrity | 1  |
| transmembrane protein 43             | Structural | Cell Structure      | Structural Integrity | 1  |
| vimentin                             | Structural | Cell Structure      | Structural Integrity | 9  |
| adenylyl cyclase-associated protein  | Structural | Cell Structure      | Trafficking          | 1  |
| coronin-3                            | Structural | Cell Structure      | Trafficking          | 1  |
| dynein                               | Structural | Cell Structure      | Trafficking          | 1  |
| myosin                               | Structural | Cell Structure      | Trafficking          | 2  |
| filamins A and B                     | Structural | Cell Structure      | Trafficking          | 5  |
| actin                                | Structural | Cell Structure      | Trafficking          | 11 |
| 1,4-alpha-glucan-branching enzyme    | Enzyme     | Glucose Homeostasis |                      | 1  |
| alcohol dehydrogenase [NADP(+)]-like | Enzyme     | Glucose Homeostasis |                      | 1  |
| c-Cbl associated protein             | Regulatory | Glucose Homeostasis |                      | 1  |



**Supplementary Materials** - Kershaw *et al.* Not just fat: Investigating the proteome of cetacean blubber tissue

|                                            |            |                                  |    |
|--------------------------------------------|------------|----------------------------------|----|
| fructose-1,6-bisphosphatase                | Enzyme     | Glucose Homeostasis              | 1  |
| glucosidase 2                              | Enzyme     | Glucose Homeostasis              | 1  |
| glycogen debranching enzyme                | Enzyme     | Glucose Homeostasis              | 1  |
| glycogen phosphorylase                     | Enzyme     | Glucose Homeostasis              | 1  |
| glycoside hydrolase                        | Enzyme     | Glucose Homeostasis              | 1  |
| hexokinase-1                               | Enzyme     | Glucose Homeostasis              | 1  |
| NADP(+)-dependent isocitrate dehydrogenase | Enzyme     | Glucose Homeostasis              | 1  |
| aldose reductase                           | Enzyme     | Glucose Homeostasis              | 2  |
| malate dehydrogenase                       | Enzyme     | Glucose Homeostasis              | 2  |
| phosphoglycerate kinase 1                  | Enzyme     | Glucose Homeostasis              | 2  |
| glucose-6-phosphate isomerase              | Enzyme     | Glucose Homeostasis              | 2  |
| phosphoglucomutase-1                       | Enzyme     | Glucose Homeostasis              | 2  |
| phosphoenolpyruvate carboxykinase (GTP)    | Enzyme     | Glucose Homeostasis              | 3  |
| fructose-bisphosphate aldolase A           | Enzyme     | Glucose homeostasis              | 6  |
| enolases                                   | Enzyme     | Glucose Homeostasis              | 14 |
| fibrinogen                                 | Structural | Immune Response and Inflammation | 1  |
| fibronectin                                | Regulatory | Immune Response and Inflammation | 1  |
| lipopolysaccharide binding protein (LBP)   | Regulatory | Immune Response and Inflammation | 1  |
| transferrin                                | Transport  | Immune Response and Inflammation | 1  |
| alpha-2-HS-glycoprotein (Fetuin A)         | Transport  | Immune Response and Inflammation | 2  |
| ferritin                                   | Transport  | Immune Response and Inflammation | 2  |

**Supplementary Materials** - Kershaw *et al.* Not just fat: Investigating the proteome of cetacean blubber tissue

|                                    |            |                                  |   |
|------------------------------------|------------|----------------------------------|---|
| alpha-1-antitrypsin                | Enzyme     | Immune Response and Inflammation | 9 |
| complement C1                      | Immune     | Immune Response and Inflammation | 1 |
| complement C4                      | Immune     | Immune Response and Inflammation | 2 |
| complement C9                      | Immune     | Immune Response and Inflammation | 1 |
| complement C3                      | Immune     | Immune Response and Inflammation | 5 |
| high mobility group protein B1     | Regulatory | Immune Response and Inflammation | 1 |
| FK506-binding protein              | Immune     | Immune Response and Inflammation | 1 |
| Lysozyme C                         | Enzyme     | Immune Response and Inflammation | 1 |
| monoglyceride lipase               | Enzyme     | Immune Response and Inflammation | 1 |
| Thy-1                              | Immune     | Immune Response and Inflammation | 1 |
| neuroleukin                        | Immune     | Immune Response and Inflammation | 2 |
| calcineurin B homologous protein 1 | Regulatory | Immune Response and Inflammation | 2 |
| CD59 glycoprotein                  | Regulatory | Immune Response and Inflammation | 2 |
| alpha-2-macroglobulin              | Regulatory | Immune Response and Inflammation | 2 |
| cyclophilins                       | Immune     | Immune Response and Inflammation | 2 |
| heparin cofactors                  | Regulatory | Immune Response and Inflammation | 2 |
| neutrophil cytosolic factor 3      | Enzyme     | Immune Response and Inflammation | 2 |
| tenascin                           | Immune     | Immune Response and Inflammation | 2 |
| dermicidin                         | Immune     | Immune Response and Inflammation | 3 |
| B cell antibody                    | Immune     | Immune Response and Inflammation | 4 |
| galectins                          | Immune     | Immune Response and Inflammation | 4 |

**Supplementary Materials** - Kershaw *et al.* Not just fat: Investigating the proteome of cetacean blubber tissue

|                                                    |            |                                  |    |
|----------------------------------------------------|------------|----------------------------------|----|
| serpins                                            | Regulatory | Immune Response and Inflammation | 5  |
| annexins                                           | Immune     | Immune Response and Inflammation | 19 |
| Igs                                                | Immune     | Immune Response and Inflammation | 35 |
| adiponectin                                        | Regulatory | Lipid Metabolism                 | 2  |
| alkyldihydroxyacetonephosphate synthase            | Enzyme     | Lipid Metabolism                 | 1  |
| acetyl-CoA acetyltransferase                       | Enzyme     | Lipid Metabolism                 | 2  |
| ATP-citrate lyase                                  | Enzyme     | Lipid Metabolism                 | 2  |
| 1-acylglycerol-3-phosphate O-acyltransferase ABHD6 | Enzyme     | Lipid Metabolism                 | 1  |
| 2-hydroxyphytanoyl-CoA lyase                       | Enzyme     | Lipid Metabolism                 | 1  |
| ATP-citrate synthase                               | Enzyme     | Lipid Metabolism                 | 1  |
| extended synaptotagmin-2                           | Transport  | Lipid Metabolism                 | 1  |
| fatty aldehyde dehydrogenase                       | Enzyme     | Lipid Metabolism                 | 1  |
| GTPase Rab7                                        | Regulatory | Lipid Metabolism                 | 1  |
| lipase                                             | Enzyme     | Lipid Metabolism                 | 1  |
| long chain fatty acyl CoA synthetase               | Enzyme     | Lipid Metabolism                 | 1  |
| fatty acid-binding protein, epidermal              | Transport  | Lipid Metabolism                 | 2  |
| long-chain-fatty-acid--CoA ligase 1                | Enzyme     | Lipid Metabolism                 | 2  |
| NADH-cytochrome b5 reductase 3                     | Enzyme     | Lipid Metabolism                 | 2  |
| peroxisomal multifunctional enzyme type 2          | Enzyme     | Lipid Metabolism                 | 2  |
| trifunctional enzyme                               | Enzyme     | Lipid Metabolism                 | 2  |
| apolipoprotein                                     | Transport  | Lipid Metabolism                 | 3  |

**Supplementary Materials** - Kershaw *et al.* Not just fat: Investigating the proteome of cetacean blubber tissue

|                                                              |            |                   |    |
|--------------------------------------------------------------|------------|-------------------|----|
| 3-ketoacyl-CoA thiolase                                      | Enzyme     | Lipid Metabolism  | 3  |
| glycerol-3-phosphate dehydrogenase [NAD(+)]                  | Enzyme     | Lipid Metabolism  | 3  |
| peroxisomal acyl-coenzyme A oxidase 1                        | Enzyme     | Lipid Metabolism  | 3  |
| perilipin-1                                                  | Regulatory | Lipid Metabolism  | 4  |
| 3-hydroxyacyl-CoA dehydrogenase                              | Enzyme     | Lipid Metabolism  | 4  |
| fatty acid synthase                                          | Enzyme     | Lipid Metabolism  | 6  |
| fatty acid-binding protein, adipocyte                        | Transport  | Lipid Metabolism  | 20 |
| decorin                                                      | Structural | Tissue Structure  | 4  |
| basement membrane-specific heparan sulfate proteoglycan core | Structural | Tissue Structure  | 6  |
| fibromodulin                                                 | Structural | Tissue Structure  | 1  |
| prolargin                                                    | Structural | Tissue Structure  | 4  |
| nidogen                                                      | Structural | Tissue Structure  | 5  |
| lumican                                                      | Structural | Tissue Structure  | 6  |
| collagen                                                     | Structural | Tissue Structure  | 12 |
| serum albumin                                                | Transport  | Transport Protein | 26 |
| alpha-1-acid glycoprotein 1                                  | Transport  | Transport Protein | 2  |
| haptoglobin                                                  | Transport  | Transport Protein | 3  |
| hemopexin                                                    | Transport  | Transport Protein | 5  |
| EH domain-containing protein 2                               | Transport  | Transport Protein | 11 |
| fetoprotein                                                  | Transport  | Transport Protein | 1  |
| Acyl-CoA-binding protein                                     | Transport  | Transport Protein | 1  |

**Supplementary Materials** - Kershaw *et al.* Not just fat: Investigating the proteome of cetacean blubber tissue

|                           |           |                   |    |
|---------------------------|-----------|-------------------|----|
| vitamin D-binding protein | Transport | Transport Protein | 2  |
| ceruloplasmin             | Transport | Transport Protein | 3  |
| serotransferrin           | Transport | Transport Protein | 3  |
| myoglobin                 | Transport | Transport Protein | 19 |
| hemoglobin                | Transport | Transport Protein | 36 |
